# Supplementary material for: Ordered arrays of a defect-modified ferroelectric polymer for non-volatile memory with minimized energy consumption
Source: Royal Society of Chemistry journal article supplement (doi:10.1039/c4nr03866e), 2014-09-22
Supplement: c4nr03866e1.pdf [file c4nr03866e1.pdf]

Electronic Supplementary Information for

## Ordered Arrays of Defect-Modified Ferroelectric Polymer for Non-volatile Memory with Minimized Energy Consumption

Xiang-Zhong Chen,<sup>‡a</sup> Xin Chen,<sup>‡a</sup> Xu Guo,<sup>b</sup> Yu-Shuang Cui<sup>b</sup>, Qun-Dong Shen,<sup>\*a</sup> and Hai-Xiong Ge<sup>\*b</sup>

<sup>a</sup> Department of Polymer Science & Engineering and Key Laboratory of High Performance Polymer Materials & Technology of MOE, School of Chemistry & Chemical Engineering, Nanjing University, Nanjing, 210093, China. E-mail: [qdshen@nju.edu.cn](mailto:qdshen@nju.edu.cn)

<sup>b</sup> Department of Materials Science & Engineering and National Laboratory of Solid State Microstructures, Nanjing University, Nanjing, 210093, China. E-mail: [haixiong@nju.edu.cn](mailto:haixiong@nju.edu.cn)

‡ These authors have contributed equally to this work

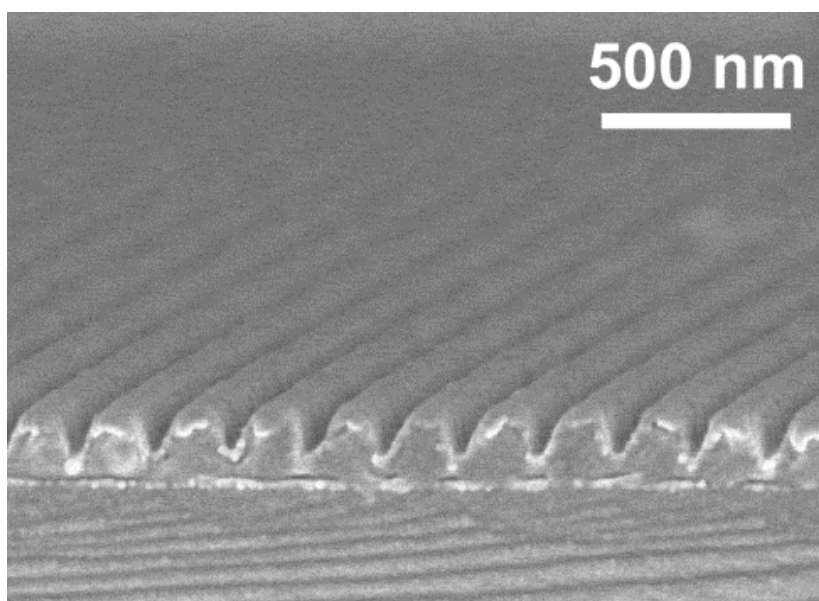

Figure S1 Cross-section SEM image of nanoimprinted terpolymer Film.
